# Supplementary material
Source: PubMed Central journal article supplement (PMC4926229)
Supplement: Supp_Table1.pdf [file Supp_Table1.pdf]

**Supplementary Table S1. Hematological and biochemical parameters for safety evaluation**

| Parameters                                     | Control (H <sub>2</sub> O Gavage) |                |         |             |              |             | 100 mg/day DOX equiv. |             |              |             |         |             | 200 mg/day DOX equiv. |             |         |             |              |       | 300 mg/day DOX equiv. |       |              |       |        |  |
|------------------------------------------------|-----------------------------------|----------------|---------|-------------|--------------|-------------|-----------------------|-------------|--------------|-------------|---------|-------------|-----------------------|-------------|---------|-------------|--------------|-------|-----------------------|-------|--------------|-------|--------|--|
|                                                | Pre-Surgical                      |                | 28 dpi  |             | Pre-Surgical |             | 28 dpi                |             | Pre-Surgical |             | 28 dpi  |             | Pre-Surgical          |             | 28 dpi  |             | Pre-Surgical |       | 28 dpi                |       | Pre-Surgical |       | 28 dpi |  |
|                                                | Mean                              | Range          | Mean    | Range       | Mean         | Range       | Mean                  | Range       | Mean         | Range       | Mean    | Range       | Mean                  | Range       | Mean    | Range       | Mean         | Range | Mean                  | Range | Mean         | Range |        |  |
| RBC (M/ $\mu$ l)                               | 9.1                               | 8.55-9.6       | 9.7     | 9.41-10.1   | 9.1          | 8.83-9.34   | 9.4                   | 9.01-9.61   | 9.1          | 8.65-9.51   | 9.3     | 8.8-9.81    | 8.9                   | 8.66-9.22   | 9.8     | 9.63-10.05  |              |       |                       |       |              |       |        |  |
| Hemoglobin (g/dL)                              | 16.6                              | 15.7-17.5      | 17.1    | 16.6-17.9   | 16.6         | 16.1-17.2   | 16.6                  | 15.8-17.3   | 16.4         | 15.5-16.9   | 16.3    | 15.5-17.1   | 16.2                  | 15.5-16.7   | 16.1    | 15.8-16.4   |              |       |                       |       |              |       |        |  |
| Hematocrit (HCT %) (PCV)                       | 46.4                              | 43.8-49.6      | 49.3    | 47.8-52.1   | 46.2         | 45.1-48.2   | 47.3                  | 45.6-49.1   | 46.4         | 43.8-48.4   | 47.1    | 44.9-49.4   | 45.4                  | 43.8-46.4   | 48.5    | 47.1-51.1   |              |       |                       |       |              |       |        |  |
| Mean Corpuscular Volume (MCV fL)               | 51.0                              | 48.9-51.7      | 50.9    | 50.3-51.6   | 51.1         | 50.3-51.6   | 50.5                  | 50.1-51.1   | 51.0         | 50.6-51.2   | 50.7    | 50.4-51     | 50.8                  | 50.3-51.5   | 49.5    | 48.5-50.8   |              |       |                       |       |              |       |        |  |
| MCH (pg)                                       | 18.2                              | 17.7-18.4      | 17.7    | 17.6-17.8   | 18.3         | 18.1-18.6   | 17.8                  | 17.5-18     | 18.0         | 17.8-18.1   | 17.5    | 17.2-17.9   | 18.1                  | 17.9-18.3   | 16.4    | 16.3-16.5   |              |       |                       |       |              |       |        |  |
| Mean Cell Hemoglobin Concentration (MCHC g/dL) | 35.7                              | 35.3-36.1      | 34.8    | 34.4-35.3   | 35.9         | 35.6-36.4   | 35.2                  | 34.6-35.6   | 35.3         | 34.9-35.4   | 34.6    | 34.2-35.2   | 35.7                  | 35.4-36     | 33.2    | 32.1-34     |              |       |                       |       |              |       |        |  |
| RDW-SD (fL)                                    | 27.0                              | 26.3-27.8      | 28.5    | 27.5-30.4   | 27.1         | 26.6-27.5   | 28.9                  | 28.7-29.3   | 27.7         | 26.9-29.4   | 28.3    | 27.7-28.7   | 27.6                  | 26.4-29.4   | 28.6    | 28.4-28.7   |              |       |                       |       |              |       |        |  |
| RDW-CV (%)                                     | 22.1                              | 21.4-22.9      | 23.3    | 22.6-24.3   | 22.1         | 21.5-22.3   | 23.1                  | 22.6-23.6   | 22.4         | 21.9-22.9   | 22.7    | 22.3-23.4   | 22.3                  | 21.7-22.9   | 23.1    | 22.7-23.8   |              |       |                       |       |              |       |        |  |
| Reticulocytes (K/uL)                           | 400.3                             | 273.6-456      | 252.3   | 226.6-280.4 | 349.1        | 305.2-382.3 | 232.8                 | 219.1-245.1 | 431.4        | 355-535.2   | 249.6   | 225.6-275.7 | 414.4                 | 305.2-535.2 | 225.1   | 213.8-233.2 |              |       |                       |       |              |       |        |  |
| Reticulocytes (%)                              | 4.4                               | 2.88-5.06      | 2.6     | 2.38-2.9    | 3.9          | 3.31-4.33   | 2.5                   | 2.28-2.65   | 4.8          | 3.85-6.18   | 2.7     | 2.3-3.06    | 4.7                   | 3.31-6.18   | 2.3     | 2.22-2.35   |              |       |                       |       |              |       |        |  |
| Platelets (K/uL)                               | 456.6                             | 288-667        | 561.4   | 501-631     | 539.0        | 351-639     | 587.3                 | 574-611     | 610.8        | 333-727     | 575.5   | 552-610     | 558.7                 | 312-727     | 601.0   | 576-641     |              |       |                       |       |              |       |        |  |
| PDW (Platelet Distribution Width fL)           | 10.5                              | 10-11.1        | 9.7     | 8.8-10.1    | 11.7         | 9.5-13.1    | 9.7                   | 9.3-9.9     | 11.1         | 9.9-14.3    | 9.4     | 9-9.9       | 10.5                  | 10-11.1     | 10.5    | 10-11.3     |              |       |                       |       |              |       |        |  |
| MPV (Mean Platelet Volume fL)                  | 8.2                               | 7.9-8.5        | 7.9     | 7.7-8.1     | 8.5          | 7.9-9.1     | 7.8                   | 7.6-7.9     | 8.2          | 7.8-8.8     | 7.5     | 7.5-7.5     | 8.2                   | 7.8-8.4     | 7.7     | 7.4-8.3     |              |       |                       |       |              |       |        |  |
| P-LCR (Platelet Larger Cell Ratio %)           | 16.5                              | 14-19.3        | 13.0    | 11.4-14.2   | 18.6         | 12.9-22.9   | 12.4                  | 10.6-13.6   | 16.0         | 13.1-21.1   | 10.1    | 9.7-10.2    | 15.9                  | 13.5-17.7   | 13.2    | 10.8-17.6   |              |       |                       |       |              |       |        |  |
| PCT (Plateletcrit %)                           | 0.4                               | 0.25-0.54      | 0.4     | 0.4-0.5     | 0.5          | 0.31-0.53   | 0.5                   | 0.44-0.48   | 0.5          | 0.29-0.58   | 0.4     | 0.41-0.46   | 0.5                   | 0.26-0.57   | 0.5     | 0.43-0.49   |              |       |                       |       |              |       |        |  |
| WBC (K/uL)                                     | 15.7                              | 12.28-21.1     | 6.2     | 5.67-6.93   | 15.4         | 13.31-17.31 | 6.0                   | 4.94-6.75   | 12.9         | 11.87-14.03 | 6.6     | 6.13-7.39   | 15.0                  | 13.41-17.31 | 7.1     | 5.77-9.12   |              |       |                       |       |              |       |        |  |
| Neutrophils (K/uL)                             | 3.8                               | 1.76-6.48      | 1.0     | 0.75-1.37   | 3.0          | 2.06-3.77   | 0.7                   | 0.55-0.92   | 2.2          | 1.98-2.43   | 0.6     | 0.43-0.82   | 2.9                   | 2.43-3.52   | 0.7     | 0.58-0.85   |              |       |                       |       |              |       |        |  |
| Lymphocytes (K/uL)                             | 10.3                              | 9.44-12.47     | 4.8     | 4.04-5.39   | 10.7         | 9.42-12.2   | 5.1                   | 4.14-5.66   | 9.6          | 9.11-10.48  | 5.5     | 4.93-6.51   | 10.4                  | 9.44-12.2   | 5.8     | 4.82-7.84   |              |       |                       |       |              |       |        |  |
| Monocytes (K/uL)                               | 1.3                               | 0.93-1.68      | 0.4     | 0.29-0.47   | 1.6          | 1.33-1.81   | 0.2                   | 0.08-0.26   | 0.9          | 0.7-1.22    | 0.4     | 0.36-0.44   | 1.3                   | 1.22-1.53   | 0.4     | 0.32-0.58   |              |       |                       |       |              |       |        |  |
| Eosinophils (K/uL)                             | 0.4                               | 0.04-0.76      | 0.0     | 0.01-0.05   | 0.1          | 0.04-0.09   | 0.0                   | 0-0.02      | 0.0          | 0.04-0.06   | 0.0     | 0.01-0.01   | 0.3                   | 0.04-0.76   | 0.0     | 0.01-0.04   |              |       |                       |       |              |       |        |  |
| Basophils (K/uL)                               | 0.1                               | 0.01-0.18      | 0.0     | 0-0.02      | 0.1          | 0.02-0.09   | 0.0                   | 0-0.02      | 0.1          | 0.02-0.08   | 0.0     | 0.01-0.01   | 0.0                   | 0.01-0.06   | 0.0     | 0-0.01      |              |       |                       |       |              |       |        |  |
| Neutrophils (%)                                | 22.5                              | 14.3-31.3      | 15.6    | 12.4-23.4   | 19.1         | 15.4-25.1   | 11.4                  | 9.8-13.7    | 17.1         | 16-18.2     | 10.0    | 9.9-13.3    | 19.5                  | 18.2-20.4   | 10.7    | 9.3-12.6    |              |       |                       |       |              |       |        |  |
| Lymphocytes (%)                                | 66.7                              | 58.7-77.3      | 77.6    | 68.7-81.1   | 69.7         | 62.6-73.6   | 84.8                  | 82.5-88.7   | 75.0         | 72-76.7     | 83.7    | 80.4-88.1   | 69.5                  | 66.1-72     | 82.3    | 77.4-86     |              |       |                       |       |              |       |        |  |
| Monocytes (%)                                  | 8.2                               | 6-10.8         | 6.3     | 5.1-7.1     | 10.4         | 8.8-11.5    | 3.5                   | 1.3-4.7     | 7.3          | 5.8-9.1     | 6.1     | 5.6-6.9     | 8.8                   | 8.5-9.1     | 6.4     | 4.5-9.3     |              |       |                       |       |              |       |        |  |
| Eosinophils (%)                                | 2.3                               | 0.3-5.3        | 0.4     | 0.2-0.7     | 0.5          | 0.2-0.6     | 0.2                   | 0-0.3       | 0.4          | 0.3-0.4     | 0.2     | 0.1-0.2     | 1.9                   | 0.2-5.3     | 0.4     | 0.1-0.7     |              |       |                       |       |              |       |        |  |
| Basophils (%)                                  | 0.3                               | 0.1-0.9        | 0.2     | 0-0.3       | 0.4          | 0.1-0.6     | 0.2                   | 0-0.3       | 0.4          | 0.2-0.6     | 0.2     | 0.1-0.2     | 0.2                   | 0.1-0.4     | 0.2     | 0.1-0.2     |              |       |                       |       |              |       |        |  |
| Glucose (mg/dL)                                | 138.8                             | 130-145        | 238.6   | 145-309     | 138.5        | 126-157     | 206.3                 | 153-269     | 136.0        | 128-142     | 219.8   | 165-253     | 139.3                 | 131-145     | 354.0   | 212-558     |              |       |                       |       |              |       |        |  |
| BUN (Blood Urea Nitrogen mg/dL)                | 47.7                              | 36-58          | 20.0    | 19-21       | 47.8         | 30-81       | 19.3                  | 17-22       | 35.0         | 30-41       | 17.8    | 15-19       | 39.1                  | 35-43.33    | 15.3    | 14-16       |              |       |                       |       |              |       |        |  |
| CRE (Creatinine mg/dL)                         | 1.1                               | 0.7-1.4        | 0.4     | 0.4-0.4     | 1.1          | 0.5-2.1     | 0.4                   | 0.3-0.4     | 0.7          | 0.5-0.9     | 0.4     | 0.4-0.4     | 0.9                   | 0.7-1.07    | 0.3     | 0.3-0.4     |              |       |                       |       |              |       |        |  |
| PHOS (Phosphorus mg/dL)                        | 10.1                              | 8.3-11.9       | 8.5     | 7.5-9.9     | 10.4         | 8.7-13.9    | 7.3                   | 6.8-8       | 9.6          | 8.9-10.1    | 7.6     | 6.4-8.4     | 9.4                   | 8.9-9.87    | 11.1    | 7.8-15.1    |              |       |                       |       |              |       |        |  |
| CA (Calcium mg/dL)                             | 10.4                              | 10.2-10.5      | 10.7    | 10.4-11.1   | 10.1         | 9.5-10.3    | 10.2                  | 10-10.5     | 10.0         | 9.8-10.3    | 10.2    | 9.6-10.5    | 10.4                  | 10.3-10.5   | 11.3    | 9.9-13.3    |              |       |                       |       |              |       |        |  |
| TP (Total Protein g/dL)                        | 6.4                               | 6.1-6.7        | 5.4     | 5.3-5.6     | 6.0          | 5.9-6.1     | 5.3                   | 5.2-5.4     | 6.2          | 6-6.4       | 5.3     | 5-5.4       | 6.2                   | 5.9-6.6     | 6.0     | 5.9-6.1     |              |       |                       |       |              |       |        |  |
| ALB (Albumin g/dL)                             | 3.4                               | 3.3-3.5        | 2.7     | 2.6-2.9     | 3.3          | 3.2-3.3     | 2.7                   | 2.6-2.7     | 3.3          | 3.2-3.4     | 2.6     | 2.5-2.7     | 3.3                   | 3.2-3.5     | 3.3     | 3-3.6       |              |       |                       |       |              |       |        |  |
| GLOB (Globulin g/dL)                           | 3.0                               | 2.8-3.2        | 2.7     | 2.6-2.8     | 2.8          | 2.7-2.8     | 2.6                   | 2.6-2.7     | 2.9          | 2.8-3       | 2.7     | 2.5-2.8     | 2.9                   | 2.7-3.1     | 2.8     | 2.5-3       |              |       |                       |       |              |       |        |  |
| ALT (Alanine Aminotransferase U/L)             | 52.7                              | 47.67-65       | 50.4    | 13-74       | 51.5         | 38-78       | 59.5                  | 54-69       | 39.3         | 25-50       | 54.0    | 38-69       | 45.9                  | 44-47.67    | 65.3    | 58-72       |              |       |                       |       |              |       |        |  |
| ALP (Alkaline Phosphatase U/L)                 | 370.1                             | 316.33-445     | 904.0   | 311-3187    | 329.8        | 250-380     | 298.5                 | 243-345     | 341.0        | 292-379     | 280.0   | 261-310     | 354.1                 | 316.33-380  | 257.67  | 172-302     |              |       |                       |       |              |       |        |  |
| TBL (Total Bilirubin mg/dL)                    | 1.0                               | 0.4-1.3        | 0.1     | 0.1-0.1     | 1.0          | 0.6-1.8     | 0.1                   | 0.1-0.1     | 1.0          | 0.6-1.2     | 0.1     | 0.1-0.1     | 0.9                   | 0.6-1.27    | 0.1     | 0.1-0.1     |              |       |                       |       |              |       |        |  |
| CHOL (Cholesterol mg/dL)                       | 67.7                              | 58.67-73       | 72.8    | 71-75       | 73.0         | 73-73       | 79.3                  | 75-81       | 58.0         | 58-58       | 77.8    | 66-86       | 63.2                  | 58-73       | 85.0    | 84-87       |              |       |                       |       |              |       |        |  |
| AMY (Amylase U/L)                              | 1,636.9                           | 1,459.67-1,736 | 1,278.0 | 1,088-1,454 | 1,444.5      | 1,197-1,567 | 1,405.3               | 1,279-1,569 | 1,415.5      | 1,382-1,478 | 1,194.3 | 1,107-1,361 | 1,458.6               | 1,382-1,534 | 1,386.0 | 1,327-1,457 |              |       |                       |       |              |       |        |  |
| AST (Aspartate Aminotransferase U/L)           | 109.9                             | 93-134         | 86.6    | 62-136      | 110.3        | 86-163      | 64.8                  | 60-73       | 80.3         | 68-87       | 99.5    | 59-211      | 88.1                  | 68-110.33   | 94.7    | 68-132      |              |       |                       |       |              |       |        |  |

Blood and sera were evaluated to determine the safety of allometrically scaled doses of DOX in rats for 1 month.
