# Supplementary material
Source: PubMed Central journal article supplement (PMC4926229)
Supplement: Supp_Table2.pdf [file Supp_Table2.pdf]

**Supplementary Table S2. Hematological and biochemical parameters for efficacy study**

| Parameters                                     | HC-Ad-TK + HC-Ad.TetOn.mCMV.hsFit3L |                                 |             |
|------------------------------------------------|-------------------------------------|---------------------------------|-------------|
|                                                | 90 dpi Survivor                     | 120 dpi Re-Challenged Survivors |             |
|                                                | Values                              | Mean                            | Range       |
| RBC (M/uL)                                     | 9.0                                 | 9.3                             | 8.8-9.81    |
| Hemoglobin (g/dL)                              | 16.1                                | 16.3                            | 15.5-17.1   |
| Hematocrit (HCT %) (PCV)                       | 45.8                                | 47.1                            | 44.9-49.4   |
| Mean Corpuscular Volume (MCV fL)               | 50.8                                | 50.7                            | 50.4-51     |
| MCH (pg)                                       | 17.9                                | 17.5                            | 17.2-17.9   |
| Mean Cell Hemoglobin Concentration (MCHC g/dL) | 35.2                                | 34.6                            | 34.2-35.2   |
| RDW-SD (fL)                                    | 28.3                                | 28.3                            | 27.7-28.7   |
| RDW-CV (%)                                     | 22.4                                | 22.7                            | 22.3-23.4   |
| Reticulocytes (K/uL)                           | 275.7                               | 249.6                           | 225.6-275.7 |
| Reticulocytes (%)                              | 3.1                                 | 2.7                             | 2.3-3.06    |
| Platelets (K/uL)                               | 559.0                               | 575.5                           | 552-610     |
| PDW (Platelet Distribution Width fL)           | 9.9                                 | 9.4                             | 9-9.9       |
| MPV (Mean Platelet Volume fL)                  | 7.5                                 | 7.5                             | 7.5-7.5     |
| P-LCR (Platelet Larger Cell Ratio %)           | 10.2                                | 10.1                            | 9.7-10.2    |
| PCT (Plateletcrit %)                           | 0.4                                 | 0.4                             | 0.41-0.46   |
| WBC (K/uL)                                     | 6.4                                 | 6.6                             | 6.13-7.39   |
| Neutrophils (K/uL)                             | 0.6                                 | 0.6                             | 0.43-0.82   |
| Lymphocytes (K/uL)                             | 5.3                                 | 5.5                             | 4.93-6.51   |
| Monocytes (K/uL)                               | 0.4                                 | 0.4                             | 0.36-0.44   |
| Eosinophils (K/uL)                             | 0.0                                 | 0.0                             | 0.01-0.01   |
| Basophils (K/uL)                               | 0.0                                 | 0.0                             | 0.01-0.01   |
| Neutrophils (%)                                | 9.7                                 | 10.0                            | 5.9-13.3    |
| Lymphocytes (%)                                | 83.0                                | 83.7                            | 80.4-88.1   |
| Monocytes (%)                                  | 6.9                                 | 6.1                             | 5.6-6.9     |
| Eosinophils (%)                                | 0.2                                 | 0.2                             | 0.1-0.2     |
| Basophils (%)                                  | 0.2                                 | 0.2                             | 0.1-0.2     |
| Glucose (mg/dL)                                | 213.0                               | 219.8                           | 165-253     |
| BUN (Blood Urea Nitrogen mg/dL)                | 19.0                                | 17.8                            | 16-19       |
| CRE (Creatinine mg/dL)                         | 0.4                                 | 0.4                             | 0.4-0.4     |
| PHOS (Phosphorus mg/dL)                        | 6.4                                 | 7.6                             | 6.4-8.4     |
| CA (Calcium mg/dL)                             | 9.6                                 | 10.2                            | 9.6-10.5    |
| TP (Total Protein g/dL)                        | 5.0                                 | 5.3                             | 5-5.4       |
| ALB (Albumin g/dL)                             | 2.5                                 | 2.6                             | 2.5-2.7     |
| GLOB (Globulin g/dL)                           | 2.5                                 | 2.7                             | 2.5-2.8     |
| ALT (Alanine Aminotransferase U/L)             | 38.0                                | 54.0                            | 38-69       |
| ALP (Alkaline Phosphatase U/L)                 | 310.0                               | 280.0                           | 261-310     |
| TBIL (Total Bilirubin mg/dL)                   | 0.1                                 | 0.1                             | 0.1-0.1     |
| CHOL (Cholesterol mg/dL)                       | 66.0                                | 77.8                            | 66-86       |
| AMYL (Amylase U/L)                             | 1,361.0                             | 1,194.3                         | 1,107-1,361 |
| AST (Aspartate Aminotransferase U/L)           | 64.0                                | 99.5                            | 59-211      |

Blood and sera were evaluated to determine the safety of allometrically scaled doses of DOX in rats for 1 month in animals bearing brain tumors. Animals were analyzed 90 days after the gene therapy to treat the primary brain tumor, and 120 days after gene therapy (30 days after a secondary tumor implantation).
